# Supplementary material for: DNA barcoding identification of Greek freshwater fishes
Source: PLoS One. 2022 Jan 26;17(1):e0263118. doi: 10.1371/journal.pone.0263118 (PMC8791500; doi:10.1371/journal.pone.0263118)
Supplement: S1 Table — For each sample are given the species to which it belongs, the BOLD accession number, the ID number with which the sample can be found in the sample collection and the area of origin. (XLSX) [file pone.0263118.s014.xlsx]

## Sheet: Sheet1
S1 Table. Samples analyzed and submitted to BOLD during the study. For each sample are given the species to which it belongs, the BOLD accession number, the ID number with which the sample can be found in the sample collection and the area of origin.
Sample ID	BOLD ID	Species	Area of origin
AUTH 001	GFFB098-18	Alburnus thessalicus	Axios River
AUTH 002	GFFB099-18	Vimba melanops	Axios River
AUTH 003	GFFB100-18	Vimba melanops	Axios River
AUTH 004	GFFB101-18	Vimba melanops	Axios River
AUTH 006	GFFB102-18	Gambusia holbrooki	Axios River
AUTH 007	GFFB103-18	Chondrostoma vardarense	Axios River
AUTH 008	GFFB104-18	Squalius vardarensis	Axios River
AUTH 009	GFFB105-18	Squalius vardarensis	Axios River
AUTH 010	GFFB106-18	Squalius vardarensis	Axios River
AUTH 011	GFFB107-18	Squalius vardarensis	Axios River
AUTH 012	GFFB108-18	Squalius vardarensis	Axios River
AUTH 013	GFFB109-18	Squalius vardarensis	Axios River
AUTH 014	GFFB110-18	Gobio bulgaricus	Axios River
AUTH 015	GFFB111-18	Gobio bulgaricus	Axios River
AUTH 016	GFFB112-18	Gobio bulgaricus	Axios River
AUTH 017	GFFB113-18	Gobio bulgaricus	Axios River
AUTH 018	GFFB114-18	Gobio bulgaricus	Axios River
AUTH 019	GFFB115-18	Gobio bulgaricus	Axios River
AUTH 020	GFFB001-17	Barbus balcanicus	Axios River
AUTH 021	GFFB002-17	Barbus balcanicus	Axios River
AUTH 022	GFFB003-17	Barbus balcanicus	Axios River
AUTH 023	GFFB004-17	Barbus balcanicus	Axios River
AUTH 024	GFFB005-17	Barbus balcanicus	Axios River
AUTH 025	GFFB116-18	Oxynoemacheilus bureschi	Axios River
AUTH 026	GFFB117-18	Oxynoemacheilus bureschi	Axios River
AUTH 027	GFFB118-18	Oxynoemacheilus bureschi	Axios River
AUTH 028	GFFB119-18	Oxynoemacheilus bureschi	Axios River
AUTH 029	GFFB120-18	Oxynoemacheilus bureschi	Axios River
AUTH 030	GFFB121-18	Oxynoemacheilus bureschi	Axios River
AUTH 031	GFFB122-18	Oxynoemacheilus bureschi	Axios River
AUTH 032	GFFB123-18	Squalius vardarensis	Axios River
AUTH 033	GFFB124-18	Squalius vardarensis	Axios River
AUTH 034	GFFB125-18	Squalius vardarensis	Axios River
AUTH 035	GFFB126-18	Sabanejewia balcanica	Axios River
AUTH 036	GFFB006-17	Barbus balcanicus	Axios River
AUTH 037	GFFB007-17	Barbus balcanicus	Axios River
AUTH 038	GFFB008-17	Barbus balcanicus	Axios River
AUTH 039	GFFB127-18	Alburnoides bipunctatus	Axios River
AUTH 040	GFFB128-18	Alburnoides bipunctatus	Axios River
AUTH 041	GFFB129-18	Alburnoides bipunctatus	Axios River
AUTH 042	GFFB130-18	Alburnoides bipunctatus	Axios River
AUTH 043	GFFB131-18	Alburnoides bipunctatus	Axios River
AUTH 044	GFFB132-18	Gambusia holbrooki	Axios River
AUTH 045	GFFB133-18	Gambusia holbrooki	Axios River
AUTH 046	GFFB134-18	Gambusia holbrooki	Axios River
AUTH 047	GFFB135-18	Gambusia holbrooki	Axios River
AUTH 048	GFFB136-18	Gobio bulgaricus	Axios River
AUTH 049	GFFB137-18	Gobio bulgaricus	Axios River
AUTH 051	GFFB138-18	Gobio bulgaricus	Axios River
AUTH 052	GFFB139-18	Squalius vardarensis	Axios River
AUTH 053	GFFB140-18	Vimba melanops	Axios River
AUTH 054	GFFB141-18	Squalius vardarensis	Axios River
AUTH 055	GFFB142-18	Vimba melanops	Axios River
AUTH 056	GFFB143-18	Vimba melanops	Axios River
AUTH 057	GFFB144-18	Squalius vardarensis	Axios River
AUTH 058	GFFB145-18	Vimba melanops	Axios River
AUTH 059	GFFB009-17	Barbus balcanicus	Axios River
AUTH 060	GFFB010-17	Barbus balcanicus	Axios River
AUTH 061	GFFB146-18	Squalius vardarensis	Axios River
AUTH 062	GFFB147-18	Squalius vardarensis	Axios River
AUTH 063	GFFB148-18	Cobitis vardarensis	Axios River
AUTH 064	GFFB149-18	Cobitis vardarensis	Axios River
AUTH 065	GFFB150-18	Cobitis vardarensis	Axios River
AUTH 066	GFFB151-18	Cobitis vardarensis	Axios River
AUTH 067	GFFB152-18	Cobitis vardarensis	Axios River
AUTH 068	GFFB153-18	Pachychilon macedonicum	Axios River
AUTH 069	GFFB154-18	Petroleuciscus borysthenicus	Vosvozis River
AUTH 070	GFFB155-18	Petroleuciscus borysthenicus	Vosvozis River
AUTH 071	GFFB156-18	Petroleuciscus borysthenicus	Vosvozis River
AUTH 072	GFFB157-18	Gobio bulgaricus	Vosvozis River
AUTH 073	GFFB158-18	Gobio bulgaricus	Vosvozis River
AUTH 074	GFFB159-18	Gobio bulgaricus	Vosvozis River
AUTH 075	GFFB160-18	Gambusia holbrooki	Vosvozis River
AUTH 077	GFFB161-18	Gambusia holbrooki	Vosvozis River
AUTH 078	GFFB162-18	Carassius gibelio	Vosvozis River
AUTH 079	GFFB163-18	Carassius gibelio	Vosvozis River
AUTH 080	GFFB164-18	Carassius gibelio	Vosvozis River
AUTH 081	GFFB165-18	Rhodeus amarus	Vosvozis River
AUTH 082	GFFB166-18	Rhodeus amarus	Vosvozis River
AUTH 083	GFFB167-18	Rhodeus amarus	Vosvozis River
AUTH 084	GFFB168-18	Cobitis strumicae	Vosvozis River
AUTH 085	GFFB169-18	Carassius gibelio	Vosvozis River
AUTH 086	GFFB170-18	Carassius gibelio	Vosvozis River
AUTH 087	GFFB171-18	Squalius orpheus	Vosvozis River
AUTH 088	GFFB172-18	Squalius orpheus	Vosvozis River
AUTH 089	GFFB173-18	Alburnus vistonicus	Vosvozis River
AUTH 090	GFFB174-18	Alburnus vistonicus	Vosvozis River
AUTH 091	GFFB175-18	Alburnus vistonicus	Vosvozis River
AUTH 092	GFFB176-18	Cobitis strumicae	Filiouris River
AUTH 093	GFFB177-18	Cobitis strumicae	Filiouris River
AUTH 094	GFFB178-18	Rhodeus amarus	Filiouris River
AUTH 095	GFFB179-18	Rhodeus amarus	Filiouris River
AUTH 096	GFFB180-18	Oxynoemacheilus bureschi	Filiouris River
AUTH 097	GFFB181-18	Oxynoemacheilus bureschi	Filiouris River
AUTH 098	GFFB182-18	Oxynoemacheilus bureschi	Filiouris River
AUTH 099	GFFB011-17	Barbus cyclolepis	Filiouris River
AUTH 100	GFFB012-17	Barbus cyclolepis	Filiouris River
AUTH 101	GFFB183-18	Alburnus vistonicus	Filiouris River
AUTH 102	GFFB184-18	Alburnus vistonicus	Filiouris River
AUTH 103	GFFB185-18	Squalius orpheus	Filiouris River
AUTH 104	GFFB186-18	Squalius orpheus	Filiouris River
AUTH 105	GFFB187-18	Squalius orpheus	Filiouris River
AUTH 106	GFFB188-18	Squalius orpheus	Filiouris River
AUTH 107	GFFB189-18	Gobio bulgaricus	Filiouris River
AUTH 108	GFFB190-18	Cobitis strumicae	Kompsatos River
AUTH 110	GFFB191-18	Gobio bulgaricus	Kompsatos River
AUTH 111	GFFB192-18	Gobio bulgaricus	Kompsatos River
AUTH 112	GFFB193-18	Rhodeus amarus	Kompsatos River
AUTH 113	GFFB194-18	Rhodeus amarus	Kompsatos River
AUTH 114	GFFB013-17	Barbus cyclolepis	Kompsatos River
AUTH 115	GFFB195-18	Squalius orpheus	Kompsatos River
AUTH 116	GFFB196-18	Squalius orpheus	Kompsatos River
AUTH 117	GFFB197-18	Alburnus vistonicus	Kosynthos River
AUTH 118	GFFB198-18	Alburnus vistonicus	Kosynthos River
AUTH 119	GFFB199-18	Alburnus vistonicus	Kosynthos River
AUTH 120	GFFB014-17	Barbus cyclolepis	Kosynthos River
AUTH 121	GFFB015-17	Barbus cyclolepis	Kosynthos River
AUTH 122	GFFB200-18	Squalius orpheus	Kosynthos River
AUTH 123	GFFB201-18	Rhodeus amarus	Kosynthos River
AUTH 124	GFFB202-18	Rhodeus amarus	Kosynthos River
AUTH 125	GFFB203-18	Oxynoemacheilus bureschi	Kosynthos River
AUTH 126	GFFB204-18	Oxynoemacheilus bureschi	Kosynthos River
AUTH 127	GFFB205-18	Alburnus vistonicus	Vistonida Lake
AUTH 128	GFFB206-18	Alburnus vistonicus	Vistonida Lake
AUTH 129	GFFB207-18	Alburnus vistonicus	Vistonida Lake
AUTH 130	GFFB208-18	Oxynoemacheilus bureschi	Filiouris River
AUTH 131	GFFB209-18	Oxynoemacheilus bureschi	Filiouris River
AUTH 132	GFFB210-18	Oxynoemacheilus bureschi	Filiouris River
AUTH 133	GFFB211-18	Oxynoemacheilus bureschi	Filiouris River
AUTH 134	GFFB212-18	Oxynoemacheilus bureschi	Filiouris River
AUTH 135	GFFB213-18	Cobitis strumicae	Filiouris River
AUTH 136	GFFB016-17	Barbus cyclolepis	Filiouris River
AUTH 137	GFFB017-17	Barbus cyclolepis	Filiouris River
AUTH 138	GFFB018-17	Barbus cyclolepis	Filiouris River
AUTH 139	GFFB019-17	Barbus cyclolepis	Filiouris River
AUTH 140	GFFB020-17	Barbus cyclolepis	Filiouris River
AUTH 141	GFFB214-18	Rhodeus amarus	Filiouris River
AUTH 142	GFFB215-18	Rhodeus amarus	Filiouris River
AUTH 143	GFFB216-18	Rhodeus amarus	Filiouris River
AUTH 144	GFFB217-18	Rhodeus amarus	Filiouris River
AUTH 145	GFFB218-18	Squalius orpheus	Filiouris River
AUTH 146	GFFB219-18	Squalius orpheus	Filiouris River
AUTH 147	GFFB220-18	Squalius orpheus	Filiouris River
AUTH 148	GFFB221-18	Squalius orpheus	Filiouris River
AUTH 149	GFFB222-18	Squalius orpheus	Filiouris River
AUTH 150	GFFB223-18	Alburnus vistonicus	Filiouris River
AUTH 151	GFFB224-18	Alburnus vistonicus	Filiouris River
AUTH 152	GFFB225-18	Alburnus vistonicus	Filiouris River
AUTH 153	GFFB226-18	Alburnus vistonicus	Filiouris River
AUTH 154	GFFB227-18	Alburnus vistonicus	Filiouris River
AUTH 155	GFFB021-17	Barbus cyclolepis	Kompsatos River
AUTH 156	GFFB022-17	Barbus cyclolepis	Kompsatos River
AUTH 157	GFFB023-17	Barbus cyclolepis	Kompsatos River
AUTH 158	GFFB024-17	Barbus cyclolepis	Kompsatos River
AUTH 160	GFFB228-18	Cobitis strumicae	Kompsatos River
AUTH 161	GFFB229-18	Cobitis strumicae	Kompsatos River
AUTH 162	GFFB230-18	Cobitis strumicae	Kompsatos River
AUTH 163	GFFB231-18	Cobitis strumicae	Kompsatos River
AUTH 164	GFFB232-18	Oxynoemacheilus bureschi	Kompsatos River
AUTH 165	GFFB233-18	Oxynoemacheilus bureschi	Kompsatos River
AUTH 166	GFFB234-18	Oxynoemacheilus bureschi	Kompsatos River
AUTH 167	GFFB235-18	Oxynoemacheilus bureschi	Kompsatos River
AUTH 168	GFFB236-18	Squalius orpheus	Kompsatos River
AUTH 169	GFFB237-18	Alburnus vistonicus	Kompsatos River
AUTH 170	GFFB238-18	Alburnus vistonicus	Kompsatos River
AUTH 171	GFFB239-18	Alburnus vistonicus	Kompsatos River
AUTH 172	GFFB240-18	Alburnus vistonicus	Kompsatos River
AUTH 173	GFFB241-18	Alburnus vistonicus	Kompsatos River
AUTH 174	GFFB242-18	Cobitis strumicae	Kosynthos River
AUTH 175	GFFB243-18	Oxynoemacheilus bureschi	Kosynthos River
AUTH 176	GFFB244-18	Oxynoemacheilus bureschi	Kosynthos River
AUTH 177	GFFB245-18	Oxynoemacheilus bureschi	Kosynthos River
AUTH 178	GFFB025-17	Barbus cyclolepis	Kosynthos River
AUTH 179	GFFB026-17	Barbus cyclolepis	Kosynthos River
AUTH 180	GFFB027-17	Barbus cyclolepis	Kosynthos River
AUTH 181	GFFB246-18	Alburnus vistonicus	Kosynthos River
AUTH 182	GFFB247-18	Alburnus vistonicus	Kosynthos River
AUTH 183	GFFB248-18	Alburnus vistonicus	Kosynthos River
AUTH 184	GFFB249-18	Squalius orpheus	Kosynthos River
AUTH 185	GFFB250-18	Squalius orpheus	Kosynthos River
AUTH 186	GFFB251-18	Squalius orpheus	Kosynthos River
AUTH 187	GFFB252-18	Gobio bulgaricus	Kosynthos River
AUTH 188	GFFB253-18	Alburnus vistonicus	Vistonida Lake
AUTH 189	GFFB254-18	Alburnus vistonicus	Vistonida Lake
AUTH 190	GFFB255-18	Alburnus vistonicus	Vistonida Lake
AUTH 191	GFFB256-18	Alburnus vistonicus	Vistonida Lake
AUTH 192	GFFB028-17	Barbus strumicae	Strymon River
AUTH 193	GFFB029-17	Barbus strumicae	Strymon River
AUTH 194	GFFB030-17	Barbus strumicae	Strymon River
AUTH 195	GFFB031-17	Barbus strumicae	Strymon River
AUTH 196	GFFB032-17	Barbus strumicae	Strymon River
AUTH 197	GFFB033-17	Barbus strumicae	Strymon River
AUTH 198	GFFB034-17	Barbus strumicae	Strymon River
AUTH 199	GFFB035-17	Barbus strumicae	Strymon River
AUTH 200	GFFB036-17	Barbus strumicae	Strymon River
AUTH 201	GFFB037-17	Barbus strumicae	Strymon River
AUTH 202	GFFB038-17	Barbus strumicae	Strymon River
AUTH 203	GFFB257-18	Alburnoides bipunctatus	Strymon River
AUTH 204	GFFB258-18	Alburnoides bipunctatus	Strymon River
AUTH 205	GFFB259-18	Alburnoides bipunctatus	Strymon River
AUTH 206	GFFB260-18	Alburnoides bipunctatus	Strymon River
AUTH 207	GFFB261-18	Alburnoides bipunctatus	Strymon River
AUTH 208	GFFB262-18	Alburnoides bipunctatus	Strymon River
AUTH 209	GFFB263-18	Alburnoides bipunctatus	Strymon River
AUTH 210	GFFB264-18	Alburnoides bipunctatus	Strymon River
AUTH 211	GFFB265-18	Alburnoides bipunctatus	Strymon River
AUTH 212	GFFB266-18	Alburnoides bipunctatus	Strymon River
AUTH 213	GFFB267-18	Carassius gibelio	Strymon River
AUTH 214	GFFB268-18	Carassius gibelio	Strymon River
AUTH 215	GFFB269-18	Carassius gibelio	Strymon River
AUTH 216	GFFB270-18	Carassius gibelio	Strymon River
AUTH 217	GFFB271-18	Carassius gibelio	Strymon River
AUTH 218	GFFB272-18	Carassius gibelio	Strymon River
AUTH 219	GFFB273-18	Carassius gibelio	Strymon River
AUTH 220	GFFB274-18	Carassius gibelio	Strymon River
AUTH 221	GFFB275-18	Carassius gibelio	Strymon River
AUTH 222	GFFB276-18	Carassius gibelio	Strymon River
AUTH 223	GFFB277-18	Rhodeus amarus	Strymon River
AUTH 224	GFFB278-18	Rhodeus amarus	Strymon River
AUTH 225	GFFB279-18	Rhodeus amarus	Strymon River
AUTH 226	GFFB280-18	Rhodeus amarus	Strymon River
AUTH 227	GFFB281-18	Rhodeus amarus	Strymon River
AUTH 228	GFFB282-18	Rhodeus amarus	Strymon River
AUTH 229	GFFB283-18	Rhodeus amarus	Strymon River
AUTH 230	GFFB284-18	Rhodeus amarus	Strymon River
AUTH 231	GFFB285-18	Rhodeus amarus	Strymon River
AUTH 232	GFFB286-18	Rhodeus amarus	Strymon River
AUTH 233	GFFB287-18	Alburnus sp. Volvi	Strymon River
AUTH 234	GFFB288-18	Alburnus sp. Volvi	Strymon River
AUTH 236	GFFB289-18	Pseudorasbora parva	Strymon River
AUTH 237	GFFB290-18	Squalius orpheus	Strymon River
AUTH 238	GFFB291-18	Squalius orpheus	Strymon River
AUTH 239	GFFB292-18	Squalius orpheus	Strymon River
AUTH 240	GFFB293-18	Squalius orpheus	Strymon River
AUTH 241	GFFB294-18	Squalius orpheus	Strymon River
AUTH 242	GFFB295-18	Squalius orpheus	Strymon River
AUTH 243	GFFB296-18	Squalius orpheus	Strymon River
AUTH 244	GFFB297-18	Squalius orpheus	Strymon River
AUTH 245	GFFB298-18	Squalius orpheus	Strymon River
AUTH 246	GFFB299-18	Squalius orpheus	Strymon River
AUTH 247	GFFB300-18	Petroleuciscus borysthenicus	Strymon River
AUTH 249	GFFB301-18	Oxynoemacheilus bureschi	Strymon River
AUTH 250	GFFB302-18	Oxynoemacheilus bureschi	Strymon River
AUTH 251	GFFB303-18	Oxynoemacheilus bureschi	Strymon River
AUTH 252	GFFB304-18	Oxynoemacheilus bureschi	Strymon River
AUTH 253	GFFB305-18	Oxynoemacheilus bureschi	Strymon River
AUTH 254	GFFB306-18	Oxynoemacheilus bureschi	Strymon River
AUTH 255	GFFB307-18	Gobio bulgaricus	Strymon River
AUTH 256	GFFB308-18	Oxynoemacheilus bureschi	Strymon River
AUTH 257	GFFB309-18	Oxynoemacheilus bureschi	Strymon River
AUTH 258	GFFB310-18	Oxynoemacheilus bureschi	Strymon River
AUTH 259	GFFB311-18	Alburnus sp. Volvi	Strymon River
AUTH 260	GFFB312-18	Alburnus sp. Volvi	Strymon River
AUTH 261	GFFB313-18	Alburnus sp. Volvi	Strymon River
AUTH 262	GFFB314-18	Alburnus sp. Volvi	Strymon River
AUTH 263	GFFB315-18	Alburnus sp. Volvi	Strymon River
AUTH 264	GFFB316-18	Alburnus sp. Volvi	Strymon River
AUTH 265	GFFB317-18	Vimba melanops	Strymon River
AUTH 266	GFFB318-18	Vimba melanops	Strymon River
AUTH 268	GFFB319-18	Chondrostoma vardarense	Strymon River
AUTH 269	GFFB320-18	Chondrostoma vardarense	Strymon River
AUTH 270	GFFB321-18	Chondrostoma vardarense	Strymon River
INALE 064	GFFB043-17	Barbus cyclolepis	Evros River
INALE 067	GFFB044-17	Barbus cyclolepis	Evros River
INALE 090	GFFB039-17	Barbus cyclolepis	Evros River
INALE 094	GFFB040-17	Barbus cyclolepis	Evros River
INALE 096	GFFB041-17	Barbus cyclolepis	Evros River
INALE 099	GFFB042-17	Barbus cyclolepis	Evros River
INALE 205	GFFB322-18	Gobio bulgaricus	Evros River
UOI 001	GFFB323-18	Gasterosteus sp.	Louros River
UOI 002	GFFB324-18	Economidichthys pygmaeus	Louros River
UOI 003	GFFB325-18	Economidichthys pygmaeus	Louros River
UOI 004	GFFB326-18	Economidichthys pygmaeus	Louros River
UOI 006	GFFB327-18	Gambusia holbrooki	Kalodiki Lake
UOI 007	GFFB328-18	Gambusia holbrooki	Kalodiki Lake
UOI 008	GFFB329-18	Gambusia holbrooki	Kalodiki Lake
UOI 009	GFFB330-18	Gambusia holbrooki	Kalodiki Lake
UOI 010	GFFB331-18	Gambusia holbrooki	Kalodiki Lake
UOI 011	GFFB332-18	Gambusia holbrooki	Kalodiki Lake
UOI 012	GFFB333-18	Gambusia holbrooki	Kalodiki Lake
UOI 013	GFFB045-17	Barbus prespensis	Megali Prespa Lake
UOI 014	GFFB046-17	Barbus prespensis	Megali Prespa Lake
UOI 015	GFFB047-17	Barbus prespensis	Megali Prespa Lake
UOI 018	GFFB334-18	Luciobarbus albanicus	Acheloos River
UOI 020	GFFB335-18	Squalius sp.	Arachthos River
UOI 021	GFFB336-18	Squalius sp.	Arachthos River
UOI 022	GFFB048-17	Barbus peloponnesius	Arachthos River
UOI 023	GFFB049-17	Barbus peloponnesius	Arachthos River
UOI 024	GFFB337-18	Cyprinus carpio	Prodani Lake
UOI 032	GFFB050-17	Barbus peloponnesius	Arachthos River
UOI 033	GFFB051-17	Barbus peloponnesius	Arachthos River
UOI 034	GFFB052-17	Barbus peloponnesius	Arachthos River
UOI 035	GFFB053-17	Barbus peloponnesius	Arachthos River
UOI 044	GFFB054-17	Barbus peloponnesius	Arachthos River
UOI 045	GFFB338-18	Telestes pleurobipunctatus	Acheloos River
UOI 046	GFFB339-18	Telestes pleurobipunctatus	Acheloos River
UOI 057	GFFB340-18	Squalius sp.	Acheloos River
UOI 058	GFFB341-18	Luciobarbus albanicus	Acheloos River
UOI 059	GFFB342-18	Alburnoides bipunctatus	Sarantaporos River
UOI 060	GFFB343-18	Alburnoides bipunctatus	Sarantaporos River
UOI 061	GFFB055-17	Barbus prespensis	Sarantaporos River
UOI 062	GFFB344-18	Oxynoemacheilus pindus	Sarantaporos River
UOI 064	GFFB097-17	Barbus prespensis	Sarantaporos River
UOI 065	GFFB057-17	Barbus peloponnesius	Kalamas River
UOI 066	GFFB407-18	Barbus peloponnesius	Kalamas River
UOI 067	GFFB058-17	Barbus peloponnesius	Kalamas River
UOI 068	GFFB345-18	Economidichthys pygmaeus	Kalamas River
UOI 069	GFFB346-18	Economidichthys pygmaeus	Kalamas River
UOI 070	GFFB347-18	Economidichthys pygmaeus	Kalamas River
UOI 071	GFFB348-18	Squalius pamvoticus	Kalamas River
UOI 072	GFFB349-18	Telestes pleurobipunctatus	Kalamas River
UOI 073	GFFB059-17	Barbus prespensis	Aoos River
UOI 074	GFFB060-17	Barbus prespensis	Aoos River
UOI 077	GFFB350-18	Alburnoides bipunctatus	Aoos River
UOI 078	GFFB351-18	Alburnoides bipunctatus	Aoos River
UOI 079	GFFB061-17	Barbus peloponnesius	Acheloos River
UOI 080	GFFB374-18	Barbus peloponnesius	Acheloos River
UOI 081	GFFB062-17	Barbus prespensis	Aoos River
UOI 082	GFFB063-17	Barbus prespensis	Aoos River
UOI 083	GFFB064-17	Barbus prespensis	Aoos River
UOI 084	GFFB065-17	Barbus prespensis	Aoos River
UOI 085	GFFB352-18	Squalius sp. Aoos	Aoos River
UOI 086	GFFB353-18	Luciobarbus albanicus	Arachthos River
UOI 087	GFFB354-18	Luciobarbus albanicus	Arachthos River
UOI 088	GFFB355-18	Telestes pleurobipunctatus	Kalamas River
UOI 089	GFFB356-18	Telestes pleurobipunctatus	Kalamas River
UOI 090	GFFB357-18	Telestes pleurobipunctatus	Kalamas River
UOI 091	GFFB358-18	Telestes pleurobipunctatus	Kalamas River
UOI 098	GFFB066-17	Barbus peloponnesius	Kalamas River
UOI 099	GFFB067-17	Barbus peloponnesius	Kalamas River
UOI 100	GFFB068-17	Barbus peloponnesius	Kalamas River
UOI 101	GFFB359-18	Telestes pleurobipunctatus	Kalamas River
UOI 106	GFFB360-18	Squalius pamvoticus	Kalamas River
UOI 107	GFFB361-18	Salmo farioides	Aoos River
UOI 108	GFFB362-18	Salmo farioides	Aoos River
UOI 109	GFFB363-18	Salmo farioides	Aoos River
UOI 110	GFFB069-17	Barbus prespensis	Aoos River
UOI 111	GFFB070-17	Barbus prespensis	Aoos River
UOI 112	GFFB364-18	Squalius pamvoticus	Arachthos River
UOI 113	GFFB365-18	Luciobarbus albanicus	Arachthos River
UOI 114	GFFB071-17	Barbus peloponnesius	Arachthos River
UOI 117	GFFB366-18	Alburnoides bipunctatus	Aoos River
UOI 118	GFFB367-18	Alburnoides bipunctatus	Aoos River
UOI 119	GFFB072-17	Barbus prespensis	Aoos River
UOI 120	GFFB073-17	Barbus prespensis	Aoos River
UOI 121	GFFB074-17	Barbus prespensis	Aoos River
UOI 122	GFFB075-17	Barbus prespensis	Aoos River
UOI 133	GFFB368-18	Squalius pamvoticus	Kalamas River
UOI 134	GFFB076-17	Barbus peloponnesius	Kalamas River
UOI 135	GFFB369-18	Telestes pleurobipunctatus	Acheron River
UOI 138	GFFB077-17	Barbus peloponnesius	Kalamas River
UOI 139	GFFB078-17	Barbus peloponnesius	Kalamas River
UOI 140	GFFB370-18	Pelasgus thesproticus	Kalamas River
UOI 150	GFFB079-17	Barbus peloponnesius	Acheloos River
UOI 151	GFFB080-17	Barbus peloponnesius	Acheloos River
UOI 152	GFFB081-17	Barbus peloponnesius	Acheloos River
UOI 154	GFFB371-18	Squalius sp.	Acheloos River
UOI 155	GFFB372-18	Squalius sp.	Acheloos River
UOI 156	GFFB373-18	Squalius sp.	Acheloos River
UOI 157	GFFB082-17	Barbus peloponnesius	Acheloos River
UOI 158	GFFB375-18	Squalius sp.	Acheloos River
UOI 159	GFFB083-17	Barbus prespensis	Aoos River
UOI 160	GFFB084-17	Barbus prespensis	Aoos River
UOI 161	GFFB085-17	Barbus prespensis	Aoos River
UOI 162	GFFB376-18	Alburnoides bipunctatus	Aoos River
UOI 163	GFFB377-18	Alburnoides bipunctatus	Aoos River
UOI 164	GFFB378-18	Alburnoides bipunctatus	Aoos River
UOI 165	GFFB379-18	Squalius sp. Aoos	Aoos River
UOI 166	GFFB380-18	Oxynoemacheilus pindus	Acheloos River
UOI 171	GFFB086-17	Barbus prespensis	Aoos River
UOI 172	GFFB381-18	Alburnoides bipunctatus	Aoos River
UOI 173	GFFB382-18	Alburnus cf. scoranza	Aoos River
UOI 174	GFFB383-18	Gobio skadarensis	Aoos River
UOI 176	GFFB384-18	Pachychilon pictum	Aoos River
UOI 177	GFFB385-18	Pachychilon pictum	Aoos River
UOI 178	GFFB087-17	Barbus peloponnesius	Kalamas River
UOI 179	GFFB088-17	Barbus peloponnesius	Kalamas River
UOI 180	GFFB089-17	Barbus peloponnesius	Arachthos River
UOI 181	GFFB090-17	Barbus peloponnesius	Arachthos River
UOI 182	GFFB386-18	Gobio skadarensis	Aoos River
UOI 183	GFFB387-18	Squalius sp.	Aoos River
UOI 184	GFFB091-17	Barbus prespensis	Aoos River
UOI 185	GFFB388-18	Salmo farioides	Kalamas River
UOI 187	GFFB389-18	Telestes pleurobipunctatus	Kalamas River
UOI 189	GFFB092-17	Barbus prespensis	Aoos River
UOI 191	GFFB093-17	Barbus prespensis	Aoos River
UOI 192	GFFB094-17	Barbus prespensis	Aoos River
UOI 193	GFFB095-17	Barbus peloponnesius	Kalamas River
UOI 194	GFFB096-17	Barbus peloponnesius	Kalamas River
UOI 197	GFFB390-18	Squalius sp. Aoos	Aoos River
UOI 199	GFFB391-18	Pachychilon pictum	Aoos River
UOI 200	GFFB392-18	Telestes pleurobipunctatus	Arachthos River
UOI 201	GFFB393-18	Telestes pleurobipunctatus	Arachthos River
UOI 202	GFFB394-18	Telestes pleurobipunctatus	Arachthos River
UOI 203	GFFB395-18	Telestes pleurobipunctatus	Arachthos River
UOI 204	GFFB396-18	Economidichthys pygmaeus	Kalamas River
UOI 206	GFFB397-18	Alburnoides bipunctatus	Aoos River
UOI 207	GFFB398-18	Alburnoides bipunctatus	Aoos River
UOI 208	GFFB399-18	Telestes pleurobipunctatus	Acheloos River
UOI 209	GFFB400-18	Telestes pleurobipunctatus	Acheloos River
UOI 210	GFFB401-18	Telestes pleurobipunctatus	Acheloos River
UOI 211	GFFB402-18	Telestes pleurobipunctatus	Acheloos River
UOI 212	GFFB403-18	Lepomis gibbosus	Aoos River
UOI 213	GFFB404-18	Lepomis gibbosus	Aoos River
UOI 214	GFFB405-18	Squalius pamvoticus	Kalamas River
UOI 215	GFFB406-18	Squalius pamvoticus	Kalamas River
