# Supplementary material for: DNA barcoding identification of Greek freshwater fishes
Source: PLoS One. 2022 Jan 26;17(1):e0263118. doi: 10.1371/journal.pone.0263118 (PMC8791500; doi:10.1371/journal.pone.0263118)
Supplement: S4 Table — For each species it is reported if it can be successfully identified by DNA barcoding, the mean intra-specific genetic distance, the maximum intra-specific genetic distance, and the minimum genetic distance from its closest-related species of the same genus. In the parentheses is given the standard error of the genetic distance. Species marked with a are species with mean intra-specific genetic distance greater than 0.0200 and they are presented in more detail in part 3.3 of the manuscript. Species marked with b are species with mean genetic distance from their closest-related species of the same genus lower than 0.0200 and no barcoding gap and they are presented in more detail in part 3.4 of the manuscript. Species marked with c are species with mean genetic distance from their closest-related species of the same genus lower than 0.0200 but exhibiting a barcoding gap and they are presented in more detail in part 3.4 of the manuscript. In the columns reporting genetic distances from closest-related species of the same genus (columns 5 and 6), a dash (-) means the species was the only one studied from this genus. (XLSX) [file pone.0263118.s017.xlsx]

## Sheet: Sheet1
S4 Table. DNA Barcoding success for the studied species. For each species it is reported if it can be successfully identified by DNA barcoding, the mean intra-specific genetic distance, the maximum intra-specific genetic distance, and the minimum genetic distance from its closest-related species of the same genus. In the parentheses is given the standard error of the genetic distance. Species mar…
Species	Identified by DNA barcoding	Mean intra-specific genetic distance	Maximum intra-specific genetic distance	Mean genetic distance from closest-related species of the same genus	Minimum genetic distance from closest-related species of the same genus
Alburnoides bipunctatus a	✓	Distances are presented in S5 Table.
Alburnoides prespensis a	✓	Distances are presented in S5 Table.
Alburnoides strymonicus a	✓	Distances are presented in S5 Table.
Alburnoides thessalicus a	✓	Distances are presented in S5 Table.
Alburnus belvica	✓	0.0005 (0.0005)	0.0020 (0.0020)	0.0350 (0.0080)	0.0340 (0.0080)
Alburnus macedonicus b	✕	Distances are presented in S10 Table.
Alburnus scoranza	✓	0.0000 (0.0000)	0.0000 (0.0000)	0.0230 (0.0060)	0.0220 (0.0060)
Alburnus sp. Volvi c - Alburnus sp.	✓	Distances are presented in S11 Table.
Alburnus thessalicus b	✕	Distances are presented in S10 Table.
Alburnus vistonicus b	✕	Distances are presented in S10 Table.
Alburnus volviticus b	✕	Distances are presented in S10 Table.
Barbus balcanicus	✓	0.0020 (0.0010)	0.0060 (0.0030)	0.0490 (0.0090)	0.0470 (0.0090)
Barbus cyclolepis	✓	0.0020 (0.0010)	0.0050 (0.0030)	0.0360 (0.0070)	0.0400 (0.0080)
Barbus euboicus c	✓	Distances are presented in S10 Table.
Barbus macedonicus	✓	0.0010 (0.0010)	0.0020 (0.0020)	0.0390 (0.0080)	0.0390 (0.0080)
Barbus peloponnesius c	✕	Distances are presented in S10 Table.
Barbus prespensis b	✕	Distances are presented in S10 Table.
Barbus sperchiensis	✓	0.0020 (0.0010)	0.0050 (0.0030)	0.0340 (0.0070)	0.0330 (0.0080)
Barbus strumicae	✓	0.0010 (0.0010)	0.0030 (0.0020)	0.0360 (0.0070)	0.0310 (0.0070)
Carassius gibelio	✓	0.0040 (0.0010)	0.0080 (0.0040)	-	-
Chondrostoma prespense	✓	0.0020 (0.0010)	0.0030 (0.0020)	0.0240 (0.0060)	0.0200 (0.0060)
Chondrostoma vardarense	✓	0.0020 (0.0010)	0.0080 (0.0040)	0.0240 (0.0060)	0.0200 (0.0060)
Cobitis arachthosensis b	✕	Distances are presented in S10 Table.
Cobitis hellenica b	✕	Distances are presented in S10 Table.
Cobitis meridionalis	✓	0.0130 (0.0040)	0.0130 (0.0040)	0.0890 (0.0130)	0.0750 (0.0120)
Cobitis punctilineata	✓	0.0020 (0.0010)	0.0050 (0.0030)	0.0570 (0.0100)	0.0550 (0.0100)
Cobitis strumicae a	✓	Distances are presented in S6 Table.		0.0570 (0.0100)	0.0550 (0.0100)
Cobitis trichonica	✓	-	-	0.1030 (0.0130)	0.1030 (0.0140)
Cobitis vardarensis	✓	0.0040 (0.0010)	0.0130 (0.0050)	0.0980 (0.0130)	0.0920 (0.0130)
Cyprinus carpio	✓	0.0010 (0.0000)	0.0030 (0.0020)	-	-
Economidichthys pygmaeus	✓	0.0020 (0.0010)	0.0030 (0.0020)	0.1210 (0.0150)	0.1190 (0.0150)
Economidichthys trichonis	✓	0.0030 (0.0010)	0.0050 (0.0030)	0.1210 (0.0150)	0.1190 (0.0150)
Gambusia holbrooki	✓	0.0000 (0.0000)	0.0000 (0.0000)	-	-
Gasterosteus sp.	✓	0.0040 (0.0020)	0.0080 (0.0030)	-	-
Gobio bulgaricus a	✓	Distances are presented in S7 Table.		0.0360 (0.0060)	0.0230 (0.0060)
Gobio feraeensis	✓	0.0010 (0.0010)	0.0050 (0.0030)	0.0250 (0.0060)	0.0230 (0.0060)
Gobio skadarensis	✓	0.0040 (0.0020)	0.0070 (0.0030)	0.0330 (0.0070)	0.0320 (0.0070)
Lepomis gibbosus	✓	0.0000 (0.0000)	0.0000 (0.0000)	-	-
Luciobarbus albanicus	✓	0.0070 (0.0020)	0.0170 (0.0050)	0.0490 (0.0090)	0.0450 (0.0080)
Luciobarbus graecus	✓	0.0000 (0.0000)	0.0000 (0.0000)	0.0490 (0.0090)	0.0450 (0.0080)
Oxynoemacheilus bureschi	✓	0.0020 (0.0010)	0.0080 (0.0040)	0.0980 (0.0090)	0.0940 (0.0130)
Oxynoemacheilus pindus	✓	0.0000 (0.0000)	0.0020 (0.0020)	0.0980 (0.0090)	0.0940 (0.0130)
Oxynoemacheilus theophilii	✓	0.0000 (0.0000)	0.0000 (0.0000)	0.1420 (0.0160)	0.1400 (0.0130)
Pachychilon macedonicum	✓	0.0030 (0.0010)	0.0180 (0.0050)	0.0770 (0.0120)	0.0760 (0.0110)
Pachychilon pictum	✓	0.0000 (0.0000)	0.0000 (0.0000)	0.0770 (0.0120)	0.0760 (0.0110)
Pelasgus laconicus	✓	0.0030 (0.0010)	0.0080 (0.0040)	0.0650 (0.0110)	0.0620 (0.0110)
Pelasgus marathonicus	✓	0.0000 (0.0000)	0.0000 (0.0000)	0.0240 (0.0060)	0.0220 (0.0060)
Pelasgus prespensis	✓	0.0140 (0.0040)	0.0190 (0.0130)	0.0790 (0.0110)	0.0710 (0.0110)
Pelasgus sp. a	✓	Distances are presented in S8 Table.		0.0270 (0.0050)	0.0200 (0.0050)
Pelasgus stymphalicus	✓	0.0020 (0.0010)	0.0050 (0.0030)	0.0240 (0.0060)	0.0220 (0.0060)
Pelasgus thesproticus	✓	0.0010 (0.0010)	0.0030 (0.0020)	0.0200 (0.0050)	0.0190 (0.0050)
Petroleuciscus borysthenicus	✓	0.0040 (0.0020)	0.0100 (0.0040)	-	-
Pseudorasbora parva	✓	0.0050 (0.0020)	0.0080 (0.0030)	-	-
Rhodeus amarus b	✕	Distances are presented in S10 Table.
Rhodeus meridionalis b	✕	Distances are presented in S10 Table.
Sabanejewia balcanica	✓	0.0010 (0.0010)	0.0020 (0.0020)	-	-
Salmo farioides b	✕	Distances are presented in S10 Table.
Salmo lourosensis b	✕	Distances are presented in S10 Table.
Salmo peristericus b	✕	Distances are presented in S10 Table.
Salmo sp. b	✕	Distances are presented in S10 Table.
Squalius cf. moreoticus b	✕	Distances are presented in S10 Table.
Squalius fellowesii	✓	0.0060 (0.0020)	0.0120 (0.0040)	0.0240 (0.0060)	0.0180 (0.0060)
Squalius keadicus	✓	0.0010 (0.0010)	0.0020 (0.0020)	0.0740 (0.0120)	0.0740 (0.0110)
Squalius orpheus	✓	0.0030 (0.0010)	0.0070 (0.0030)	0.0240 (0.0060)	0.0180 (0.0060)
Squalius pamvoticus c	✓	0.0020 (0.0010)	0.0050 (0.0020)	0.0180 (0.0050)	0.0150 (0.0050)
Squalius peloponensis b	✕	Distances are presented in S10 Table.
Squalius platyceps b	✕	Distances are presented in S10 Table.
Squalius prespensis b	✕	Distances are presented in S10 Table.
Squalius vardarensis	✓	0.0050 (0.0030)	0.0070 (0.0030)	0.0230 (0.0060)	0.0220 (0.0060)
Telestes pleurobipunctatus a	✓	Distances are presented in S9 Table.		0.0380 (0.0080)	0.0360 (0.0080)
Telestes beoticus	✓	0.0020 (0.0010)	0.0030 (0.0020)	0.0380 (0.0080)	0.0360 (0.0080)
Vimba melanops	✓	0.0030 (0.0010)	0.0070 (0.0030)	-	-
