# Supplementary material for: DNA barcoding identification of Greek freshwater fishes
Source: PLoS One. 2022 Jan 26;17(1):e0263118. doi: 10.1371/journal.pone.0263118 (PMC8791500; doi:10.1371/journal.pone.0263118)
Supplement: S10 Table — In parentheses, the standard error is given. (XLSX) [file pone.0263118.s023.xlsx]

## Sheet: Sheet1
S10 Table. Genetic distances between and within species with mean genetic distance lower than 0.0200. In parentheses, the standard error is given.
Species or populations	Minimum interspecific distance	Mean interspecific distance	Maximum interspecific distance	Maximum intraspecific distance
Alburnus thessalicus and Alburnus macedonicus	0.0000 (0.0000)	0.0040 (0.0020)	0.0070 (0.0030)	0.0050 (0.0030)
Alburnus volviticus and Alburnus vistonicus	0.0000 (0.0000)	0.0020 (0.0010)	0.0050 (0.0030)	0.0030 (0.0020)
Barbus euboicus and Barbus peloponnesius	0.0100 (0.0040)	0.0110 (0.0030)	0.0110 (0.0040)	0.0160 (0.0050)
Barbus prespensis and Barbus peloponnesius from Arachthos River, and certain specimens of B. peloponnesius from Kalamas and Acheloos Rivers	0.0000 (0.0000)	0.0090 (0.0030)	0.0150 (0.0050)	0.1500 (0.0050)
Cobitis hellenica and Cobitis arachthosensis	0.0000 (0.0000)	0.0010 (0.0010)	0.0070 (0.0030)	0.0070 (0.0030)
Rhodeus amarus and Rhodeus meridionalis	0.0000 (0.0000)	0.0150 (0.0030)	0.0220 (0.0060)	0.0200 (0.0060)
Salmo spp.	0.0000 (0.0000)	0.0040 (0.0020)	0.0080 (0.0040)	0.0070 (0.0030)
Squalius cf. moreoticus and Squalius peloponensis	0.0000 (0.0000)	0.0080 (0.0030)	0.0170 (0.0050)	0.0170 (0.0050)
Squalius prespensis and Squalius platyceps from Aoos River	0.0000 (0.0000)	0.0020 (0.0010)	0.0030 (0.0020)	0.0020 (0.0020)
